# Supplementary material for: Evolution of the gene regulatory network of body axis by enhancer hijacking in amphioxus
Source: eLife. 2024 Jan 17;13:e89615. doi: 10.7554/eLife.89615 (PMC10794066; doi:10.7554/eLife.89615)
Supplement: Figure 1—figure supplement 3—source data 1. [file elife-89615-fig1-figsupp3-data1.xlsx]

## Sheet: Sheet1
			GAPDH		Lefty				GAPDH		Gdf1/3				GAPDH		Gdf1/3-like				GAPDH		Nodal
Stage	Biological replicate	Technical replicate	Cq	Cq Mean	Cq	Cq Mean	▲Cq	2-▲Cq	Cq	Cq Mean	Cq	Cq Mean	▲Cq	2-▲Cq	Cq	Cq Mean	Cq	Cq Mean	▲Cq	2-▲Cq	Cq	Cq Mean	Cq	Cq Mean	▲Cq	2-▲Cq
egg	egg#2	a	20.8467	20.7648	29.7385	29.3915	8.62663	0.00253003	20.0872	20.1215					19.1871	19.5389	25.1698	24.7628	5.22386	0.0267586	20.2391	20.142		17.7291	-2.41292	5.32551
		b	20.7652		29.208				20.2328						19.8908		24.3557				20.0376		17.7356
		c	20.6826		29.2278				20.0447												20.1493		17.7226
	egg#3	a	20.3058	20.2553	25.7007	25.6987	5.44342	0.022981	19.5301	19.539		35.9491	16.4101	1.14832e-05	19.2211	19.2127		32.0988	12.8862	0.00013209	19.4703	19.4766	17.2292	17.1266	-2.34998	5.09817
		b	20.3063		25.4809				19.6547		36.1286				19.3255		32.1187				19.4276		17.0111
		c	20.1539		25.9146				19.4323		35.7697				19.0914		32.079				19.5318		17.1394
	egg#4	a	20.9088	20.8712	27.0676	27.0329	6.1617	0.0139683	20.166	20.1527	37.3958	37.5898	17.4372	5.63499e-06	19.5728	19.6607	29.5429	30.0135	10.3529	0.000764661	20.7084	20.3989	17.8022	17.756	-2.64285	6.24563
		b	20.8829		27.1596				20.1526		37.7838				19.6647		29.6944				20.2503		17.6822
		c	20.8218		26.8715				20.1394						19.7444		30.8033				20.2379		17.7836
1-cell	1-cell#1	a	21.5141	21.3909	31.0299	31.0928	9.70197	0.00120065	21.9764	22.0787	36.6514	37.4853	15.4066	2.30227e-05	19.5296	19.6203	29.0784	28.8867	9.26643	0.00162377	21.0155	21.0147	17.939	18.0505	-2.96414	7.80359
		b	21.3011						22.0696		36.2468				20.0511		28.6949				21.0417		18.1806
		c	21.3574		31.1558				22.1902		39.5578				19.2801						20.9867		18.032
	1-cell#4	a	20.343	20.2926	28.0869	27.826	7.53348	0.00539754	20.8697	20.975	34.9078	35.4111	14.436	4.51145e-05	19.1984	19.1208	32.2365	32.9278	13.807	6.97717e-05	19.809	19.8852	17.7532	17.6974	-2.18786	4.55629
		b	20.2398		27.7958				20.7904		36.1218				19.0433		33.5998				19.7916		17.7054
		c	20.2948		27.5954				21.265		35.2036						32.9472				20.0551		17.6334
	1-cell#5	a	21.1786	21.1942	27.5972	28.0244	6.83028	0.00878782	21.9823	21.8418	35.3925	35.6255	13.7838	7.09042e-05	19.9048	20.4019	33.2963	33.3205	12.9186	0.000129155	20.7088	20.6584	18.5934	18.7021	-1.95631	3.88067
		b	21.2387		28.3722				21.6215		34.8956				20.8991		32.9643				20.6798		18.7263
		c	21.1652		28.104				21.9215		36.5884						33.701				20.5867		18.7867
4-cell	4-cell#2	a	19.9314	19.729		27.7598	8.03084	0.00382363	20.4685	20.675		35.6612	14.9862	3.08117e-05	19.9314	19.729	29.0102	29.9776	10.2486	0.000821958	19.9314	19.729	18.2617	18.3862	-1.34281	2.53645
		b	19.5311		27.805				20.5408		35.6612				19.5311		28.1709				19.5311		18.7787
		c	19.7245		27.7146				21.0158						19.7245		32.7518				19.7245		18.1181
	4xells#3	a		21.2372	27.2583	27.0508	5.81356	0.0177805		22.0346		36.3323	14.2977	4.96561e-05		21.2372	31.2218	31.0599	9.82271	0.00110426		21.2372	21.1661	21.1635	-0.0736723	1.05239
		b	21.2954		26.9344				21.6962		36.64				21.2954		31.4243				21.2954		21.2517
		c	21.179		26.9596				22.373		36.0245				21.179		30.5336				21.179		21.0728
	4-cell#4	a	21.3791	21.4567	27.619	27.5084	6.05171	0.0150749	22.1682	22.2306		39.4136	17.183	6.7205e-06	21.3791	21.4567	32.2977	32.2402	10.7835	0.000567353	21.3791	21.4567	21.078	21.195	-0.261754	1.19894
		b	21.5413		27.2792				22.2929		39.8205				21.5413		32.8953				21.5413		21.2159
		c	21.4497		27.6271						39.0066				21.4497		31.5275				21.4497		21.291
16-cell	16-cell#5	a	19.4499	19.471	34.9536	34.9536	15.4826	2.18414e-05		19.8534	34.7471	34.5173	14.6639	3.85223e-05	18.1519	18.0932	24.0676	24.0805	5.9873	0.0157632	20.4301	20.1271		18.6188	-1.50832	2.84479
		b	19.4089						19.7476		34.2875				18.0346		24.0935				20.0276		18.4732
		c	19.5542						19.9592												19.9236		18.7643
	16-cell#7	a	19.8308	19.8768		33.1863	13.3095	9.85004e-05	19.9592	19.8534	34.4837	34.5323	14.6789	3.81248e-05	18.0317	18.2558	28.873	28.5834	10.3276	0.000778192	20.4599	20.3316	18.3746	18.3578	-1.97383	3.9281
		b	19.9408		32.9639				19.7476		35.0049				18.4799		28.2937				20.2592		18.3443
		c	19.8587		33.4087						34.1082										20.2758		18.3546
	16-cell#8	a	19.1999	19.1906		34.7568	15.5661	2.06122e-05	19.3993	20.1435	33.8692	33.7567	13.6131	7.98078e-05	18.0341	18.4025	25.5503	25.7756	7.37314	0.00603204	19.7952	19.7663	18.4381	18.3539	-1.41248	2.66195
		b	19.197		34.0473				20.8878		33.6441				18.4095		25.699				19.635		18.3841
		c	19.175		35.4663										18.7639		26.0776				19.8689		18.2395
32-cell	32-cell#2	a	20.1129	20.0423	29.3797	29.2142	9.17191	0.00173373	20.5122	20.5412	37.548	37.3655	16.8243	8.61751e-06	18.7928	18.9666	32.3683	33.0656	14.0991	5.69847e-05	19.503	19.4347	19.2977	19.2314	-0.203287	1.15132
		b	20.0869		29.1571				20.609		37.1831				19.0906		33.7629				19.3121		19.2999
		c	19.9272		29.1059				20.5025						19.0162						19.4889		19.0966
	32-cell#3	a	19.2833	19.3482		27.8842	8.53597	0.00269413	20.01	20.0294	34.1369	34.5089	14.4794	4.37781e-05	18.8001	18.737		33.425	14.688	3.78848e-05	18.7094	18.8733	17.4064	17.3732	-1.50006	2.82855
		b	19.3375		28.0972				20.0191		35.1506				18.5881		33.2483				18.8074		17.3195
		c	19.4239		27.6712				20.0592		34.2391				18.8228		33.6017				19.103		17.3937
	32-cell#4	a	20.2328	20.3443		27.5485	7.20416	0.0067816	20.9325	20.9368	37.2477	37.0762	16.1395	1.38527e-05	19.348	19.2878	37.9709	35.6416	16.3537	1.19407e-05	19.4393	19.6129	19.1439	18.9669	-0.646028	1.56485
		b	20.2338		27.5184				20.9029		37.1375				19.183		33.92				19.2253		18.5106
		c	20.5663		27.5786				20.975		36.8435				19.3324		35.0338				20.1741		19.2461
64-cell	64-cell#1	a	20.2391	20.2675	30.0159	29.8557	9.58826	0.00129911	20.6789	20.7454	34.7471	34.5173	13.7719	7.14893e-05	19.8811	20.0645	34.2883	32.5271	12.4625	0.000177177	21.2607	21.3575	21.3602	21.2932	-0.0643662	1.04563
		b	20.2658		29.5474				20.7187		34.2875				20.248		30.7658				21.4544		21.6574
		c	20.2976		30.0039				20.8385														20.862
	64-cell#4	a	21.4756	21.3614	31.2428	30.8117	9.45034	0.00142943	20.7862	20.7991	35.4166	34.9244	14.1253	5.59568e-05	19.5587	19.7582	34.4484	34.6554	14.8972	3.2772e-05	20.4583	20.6344	19.3685	19.3548	-1.27957	2.42767
		b	21.7007		30.9025				20.8044		34.3474				19.9578		34.8625				20.2904		19.1587
		c	20.9078		30.2899				20.8068		35.0092										21.1543		19.5371
	64-cell#5	a	18.9607	18.971	26.207	26.1674	7.1964	0.00681817	19.5887	19.5997	33.8802	34.334	14.7344	3.66871e-05	18.5779	18.5643	34.5058	34.249	15.6847	1.89866e-05	19.4018	19.3043	18.567	18.6256	-0.678758	1.60076
		b	18.9813		26.1278				19.4287		34.451				18.6946		34.386				19.1333		18.6569
		c							19.7816		34.671				18.4205		33.8552				19.3779		18.6529
256-cell	256-cell#1	a	19.4998	19.3411	22.7141	22.4619	3.12072	0.114966	20.1638	20.1844	32.2662	32.4863	12.3019	0.000198049	18.0784	18.2602	19.6062	19.9476	1.6874	0.310487	20.4423	20.419	19.602	19.5859	-0.833124	1.78154
		b	19.0409		22.6205				20.2269		32.7064				18.442		20.3974				20.4866		19.626
		c	19.4826		22.0509				20.1627								19.8392				20.3281		19.5296
	256-cell#4	a	19.0703	18.9293	21.0533	21.1589	2.22957	0.213222	19.4092	19.3417	32.3476	32.0004	12.6587	0.000154649	18.1748	18.2482	20.8357	20.9509	2.70267	0.153608		19.8472	18.6992	18.6116	-1.23563	2.35484
		b	18.688		21.0306				19.3013		31.7735				18.3215		21.107				19.6765		18.4654
		c	19.0297		21.3928				19.3147		31.8802						20.9099				20.018		18.6702
	256-cell#5	a	19.4132	19.3196	23.1128	23.1057	3.7861	0.0724885	20.04	20.1232		32.9172	12.794	0.000140811	18.844	18.844	23.7011	24.0202	5.17616	0.027658	20.4949	20.4736	20.4738	20.4005	-0.0731176	1.05199
		b	19.0888		23.0735				20.1338		32.5658						24.3392				20.3349		20.3959
		c	19.4566		23.1306				20.1958		33.2685										20.5911		20.3319
G1	G1#1	a	22.0434	22.0106	22.6719	22.3751	0.364593	0.776688	21.7146	21.9284	37.352	37.8081	15.8797	1.6586e-05	22.8222	22.6588	24.985	24.3818	1.72299	0.302921	22.8222	22.6588	21.767	21.5561	-1.10268	2.14753
		b	21.8682		21.8002				22.2759		38.2642				22.5803		23.4428				22.5803		21.4207
		c	22.1201		22.6533				21.7949						22.5738		24.7175				22.5738		21.4806
	G1#2	a	20.0043	19.894	20.8285	20.913	1.01903	0.493449	20.0548	20.1788	30.3614	30.6235	10.4447	0.000717534	20.1365	20.2569	22.0085	21.9759	1.71903	0.303753	20.1365	20.2569	18.4323	18.5903	-1.66654	3.17452
		b	20.249		20.853				20.3828		30.8856				20.346		22.511				20.346		18.5185
		c	19.4286		21.0575				20.0989						20.2882		21.4082				20.2882		18.8203
	G1#3	a		19.5802	19.5867	19.513	-0.0671747	1.04766	19.1853	19.6702	30.1376	30.3801	10.71	0.000597004	20.2536	20.2421	20.8129	20.5842	0.342062	0.788913	20.2536	20.2421	18.5824	18.5757	-1.66641	3.17424
		b	19.7677		19.2196				20.1454		30.368				20.095		20.4435				20.095		18.3379
		c	19.3927		19.7327				19.6798		30.6347				20.3778		20.4962				20.3778		18.8068
G4	G4#2	a	20.0138	20.0932	19.1805	19.1413	-0.951997	1.93455	19.2924	19.1992		29.7006	10.5013	0.000689892	20.2852	20.3738	20.6214	20.8655	0.491654	0.711209	20.2852	20.3738	19.1526	19.154	-1.21986	2.32925
		b	20.1727		19.3689				18.666		30.0239				20.4539		20.6682				20.4539		19.1826
		c			18.8743				19.6393		29.3772				20.3824		21.3068				20.3824		19.1266
	G4#4	a	20.0527	19.7449	19.2012	18.9316	-0.813352	1.75729		20.8096	27.9164	27.9166	7.10704	0.00725386		20.8096		20.8754	0.0658504	0.955382	20.5183	20.2604	18.9666	19.1407	-1.11965	2.17294
		b	19.5445		18.7631				21.0227		27.9077				21.0227		20.7144				20.0025		19.0168
		c	19.6376		18.8304				20.5964		27.9257				20.5964		21.0364						19.4388
	G4#5	a	20.6378	20.6194	19.5929	19.7394	-0.880024	1.84041	20.8317	20.9119	28.3523	28.3935	7.48161	0.00559513	20.8317	20.9119	20.5343	21.2019	0.28999	0.817908	20.8317	20.9119	19.5307	19.7349	-1.17705	2.26114
		b	21.0117		20.0308				20.9935		28.4664				20.9935		21.6279				20.9935		19.939
		c	20.2088		19.5945				20.9105		28.3619				20.9105		21.4435				20.9105
G6	G6#1	a	21.1078	21.3927	21.1085	21.4054	0.0126834	0.991247	20.1864	20.0647	29.1557	29.1017	9.037	0.00190367	20.1864	20.0647	20.9148	21.0444	0.979739	0.507071	20.1864	20.0647	18.6026	18.8313	-1.23341	2.35121
		b	21.7461		21.8474				20.1951		28.9391				20.1951		21.1741				20.1951		18.9662
		c	21.3241		21.2602				19.8126		29.2103				19.8126						19.8126		18.9251
	G6#2	a	20.3266	20.2568	19.3876	19.3923	-0.864463	1.82066	20.6596	20.7367	31.4483	31.2712	10.5346	0.000674187	21.1465	21.1399	23.5464	23.1934	2.05347	0.240904	21.1465	21.1399	20.2425	20.3411	-0.79881	1.73966
		b	20.2388		19.1416				20.9354		31.2074				21.3801		22.8404				21.3801		20.4397
		c	20.2049		19.6478				20.6151		31.158				20.8931						20.8931
	G6#3	a	21.5245	21.3765	21.4565	20.9208	-0.45565	1.3714	21.4346	21.0495	29.5487	29.375	8.32557	0.00311713	21.4346	21.0495	21.6254	21.5559	0.506399	0.703977	21.4346	21.0495	20.0419	19.8851	-1.1644	2.2414
		b	21.2015		20.4095				20.9901		29.3308				20.9901		21.4863				20.9901		19.9198
		c	21.4033		20.8964				20.7237		29.2456				20.7237						20.7237		19.6935
N4	N4#6	a	18.5974	18.4276	21.0048	20.641	2.21339	0.215627	19.4913	19.4557	24.3426	24.3516	4.89595	0.033587	19.2561	19.3467	20.1537	19.8624	0.515687	0.69946	19.6945	19.8208	20.4074	20.4389	0.618053	0.65155
		b	18.2577		20.2772				19.42		24.6597				19.5403		19.7835				19.7507		20.5156
		c									24.0526				19.2437		19.6499				20.0172		20.3936
	N4#7	a	18.3461	18.1544	18.711	19.0657	0.91131	0.531702		20.3381	23.5415	23.4643	3.12618	0.114532	19.2432	19.4622	19.4	19.873	0.410813	0.752199	19.5981	19.7374	20.0145	20.0701	0.332681	0.79406
		b	17.9627		19.4204				20.9205		23.5336				19.6812		19.8193				19.6395		20.0989
		c							19.7558		23.3179						20.3997				19.9746		20.0969
	N4#8	a	18.43	18.5787	19.4914	19.5007	0.922029	0.527766	19.4758	19.7139	23.8294	23.8461	4.13224	0.057026	18.6486	18.965	20.0014	20.3044	1.33933	0.395205	19.96	19.995	20.6156	20.5115	0.51649	0.69907
		b	18.6589		19.51				19.4785		23.8406				18.9074		20.3389				19.7883		20.3897
		c	18.647						20.1873		23.8683				19.3392		20.5729				20.2368		20.5292
T0	T0#6	a	19.3579	18.928		22.9338	4.00575	0.0622512	19.3579	18.928	23.0764	23.1569	4.2289	0.0533302	19.3579	18.928	22.6669	23.5504	4.62236	0.0406005		19.3589		22.3089	2.94997	0.12941
		b	18.8045		22.8427				18.8045		23.3046				18.8045		24.4339				19.1601		22.2394
		c	18.6216		23.0249				18.6216		23.0897				18.6216						19.5578		22.3784
	T0#7	a	18.6625	18.8378	22.5104	22.8482	4.01047	0.0620481	18.6625	18.8378	22.6132	22.8894	4.05166	0.0603016	18.6625	18.8378	22.8604	23.3324	4.4946	0.0443599	19.1955	19.2775	21.6533	21.541	2.2635	0.208266
		b	19.1697		23.1861				19.1697		22.8541				19.1697		23.8044				19.3687		21.4695
		c	18.6811						18.6811		23.201				18.6811						19.2681		21.5001
	T0#8	a	18.8516	18.8509	21.2276	21.3221	2.47118	0.180343	18.8516	18.8509	22.4041	22.2595	3.40852	0.0941744	18.8516	18.8509	22.1285	22.3952	3.54428	0.0857165	19.0909	19.308	21.0337	21.2321	1.92408	0.263508
		b	18.9442		21.4166				18.9442		21.985				18.9442		22.6619				19.6831		21.3486
		c	18.757						18.757		22.3893				18.757						19.15		21.3139
L0	L0#1	a	15.4946	15.6026	22.7246	23.1461	7.54345	0.00536036	15.4946	15.6026	21.7824	21.5016	5.89892	0.016759	15.4946	15.6026	24.1676	24.2764	8.67378	0.00244868	15.4946	15.6026	22.6878	22.468	6.86534	0.00857682
		b	15.4336		23.5026				15.4336		21.563				15.4336		24.3853				15.4336		22.508
		c	15.8797		23.2111				15.8797		21.1593				15.8797						15.8797		22.2081
	L0#2	a	17.4808	17.6823	24.7328	24.8226	7.1403	0.00708853	17.4808	17.6823	24.9269	24.8826	7.20035	0.00679953	17.4808	17.6823	25.626	25.9161	8.23384	0.00332176	17.4808	17.6823	24.484	24.8169	7.13458	0.00711669
		b	17.813		24.9706				17.813		24.9294				17.813		26.2626				17.813		24.6585
		c	17.7531		24.7643				17.7531		24.7916				17.7531		25.8598				17.7531		25.3081
	L0#3	a	15.2859	15.0201	22.2939	22.0438	7.02375	0.00768494	15.2859	15.0201	21.1494	21.2073	6.18721	0.0137235	15.2859	15.0201	23.5892	23.5919	8.57183	0.00262798	15.2859	15.0201	22.3884	22.4446	7.42456	0.00582083
		b	15.1081		21.9692				15.1081		21.4696				15.1081		23.8487				15.1081		22.7589
		c	14.6661		21.8683				14.6661		21.0028				14.6661		23.3378				14.6661		22.1866

## Sheet: Sheet2
	egg	1-cell	4-cell	16-cell	32-cell	64-cell	256-cell	G1	G4	G6	N4	T0	L0
Lefty	0.00253003	0.00120065	0.00382363	2.18414e-05	0.00173373	0.00129911	0.114966	0.776688	1.93455	0.991247	0.215627	0.0622512	0.00536036
	0.022981	0.00539754	0.0177805	9.85004e-05	0.00269413	0.00142943	0.213222	0.493449	1.75729	1.82066	0.531702	0.0620481	0.00708853
	0.0139683	0.00878782	0.0150749	2.06122e-05	0.0067816	0.00681817	0.0724885	1.04766	1.84041	1.3714	0.527766	0.180343	0.00768494
Gdf1/3	0	2.30227e-05	3.08117e-05	3.85223e-05	8.61751e-06	7.14893e-05	0.000198049	1.6586e-05	0.000689892	0.00190367	0.033587	0.0533302	0.016759
	1.14832e-05	4.51145e-05	4.96561e-05	3.81248e-05	4.37781e-05	5.59568e-05	0.000154649	0.000717534	0.00725386	0.000674187	0.114532	0.0603016	0.00679953
	5.63499e-06	7.09042e-05	6.7205e-06	7.98078e-05	1.38527e-05	3.66871e-05	0.000140811	0.000597004	0.00559513	0.00311713	0.057026	0.0941744	0.0137235
Gdf1/3-like	0.0267586	0.00162377	0.000821958	0.0157632	5.69847e-05	0.000177177	0.310487	0.302921	0.711209	0.507071	0.69946	0.0406005	0.00244868
	0.00013209	6.97717e-05	0.00110426	0.000778192	3.78848e-05	3.2772e-05	0.153608	0.303753	0.955382	0.240904	0.752199	0.0443599	0.00332176
	0.000764661	0.000129155	0.000567353	0.00603204	1.19407e-05	1.89866e-05	0.027658	0.788913	0.817908	0.703977	0.395205	0.0857165	0.00262798
Nodal	5.32551	7.80359	2.53645	2.84479	1.15132	1.04563	1.78154	2.14753	2.32925	2.35121	0.65155	0.12941	0.00857682
	5.09817	4.55629	1.05239	3.9281	2.82855	2.42767	2.35484	3.17452	2.17294	1.73966	0.79406	0.208266	0.00711669
	6.24563	3.88067	1.19894	2.66195	1.56485	1.60076	1.05199	3.17424	2.26114	2.2414	0.69907	0.263508	0.00582083
