# Supplementary material for: Evolution of the gene regulatory network of body axis by enhancer hijacking in amphioxus
Source: eLife. 2024 Jan 17;13:e89615. doi: 10.7554/eLife.89615 (PMC10794066; doi:10.7554/eLife.89615)
Supplement: Figure 4—source data 1. [file elife-89615-fig4-data1.xlsx]

## Sheet: 4B
	% of each class					Number
	Strong	Mild	Weak	Absent		Strong	Mild	Weak	Absent	Total
mCherry-DMSO	55.5556	40.7407	3.7037	0		15	11	1	0	27
mCherry-SB	17.5439	29.8246	43.8596	8.77193		10	17	25	5	57
eGFP-DMSO	23.0769	53.8462	19.2308	3.84615		6	14	5	1	26
eGFP-SB	2.08333	35.4167	52.0833	10.4167		1	17	25	5	48
